# Supplementary material for: Structure of bovine cytochrome c oxidase in the ligand-free reduced state at neutral pH
Source: PubMed Central journal article supplement (PMC5947679; doi:10.1107/s2053230x17018532), 2018-01-26
Supplement: f-74-00092-sup1.pdf [file f-74-00092-sup1.pdf]

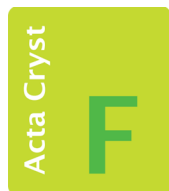

STRUCTURAL BIOLOGY  
COMMUNICATIONS

**Volume 74 (2018)**

**Supporting information for article:**

**Structure of bovine cytochrome c oxidase in the ligand-free  
reduced state at neutral pH**

**Fangjia Luo, Kyoko Shinzawa-Itoh, Kaede Hagimoto, Atsuhiko Shimada,  
Satoru Shimada, Eiki Yamashita, Shinya Yoshikawa and Tomitake  
Tsukihara**

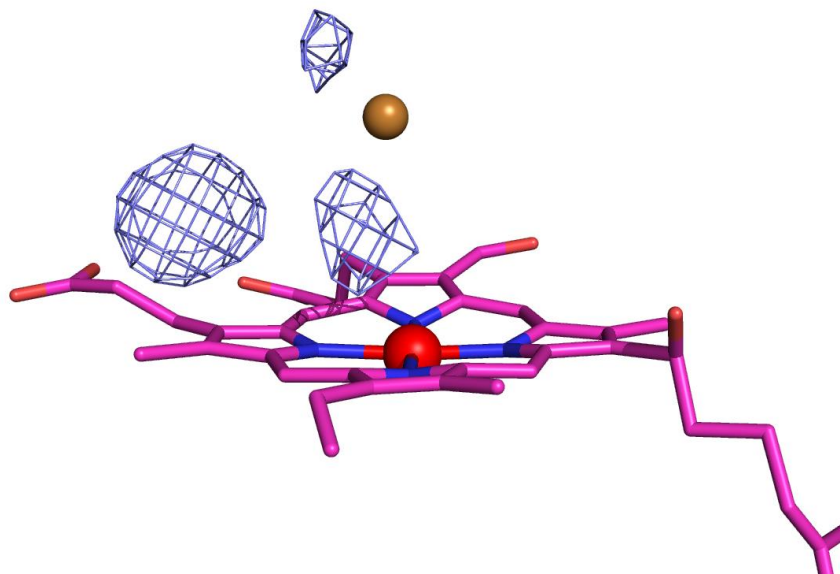

**Figure S1** Difference maps calculated with coefficients  $(|F_o| - |F_c|)\exp(i\alpha_c)$ . Heme  $a_3$  are drawn as stick models, with C, N and O atoms coloured purple, blue and red, respectively.  $\text{Fe}_{a_3}$  and  $\text{Cu}_B$  are shown as red and brown spheres, respectively. All difference maps were drawn at the  $2.0 \sigma$  level. The electron density between  $\text{Fe}_{a_3}$  and  $\text{Cu}_B$  indicates the density of a peroxide anion of the fully oxidized CcO. The large density between two propionates is the density of a water molecule that is not included in the structure refinement. The peak height of the peroxide is 33% of that of the water. The occupancy of the peroxide converged to 0.20 in the structure refinement. Thus the present reduced crystal contains the fully oxidized CcO at 20%.
